# Supplementary material for: Body Composition of Common Bottlenose Dolphins in Sarasota Bay, Florida
Source: Frontiers journal article supplement (doi:10.3389/fmars.2021.615773), 2021-06-15
Supplement: Table_1.docx [file Table_1.docx]

Supplementary Table 1. Sample sizes, mean values, and standard error for body composition, defined as the ratio of blubber volume to total body volume, of common bottlenose dolphins in Sarasota Bay, Florida.

| Maturity Status | Sex and Reproductive Status | Sample Size | Body composition |
| --- | --- | --- | --- |
| Immature | Male | 124 | 0.198+0.002 |
| Female | 130 | 0.194+0.002 |
| Mature | Male | 150 | 0.169+0.002 |
| Female (all) | 130 | 0.187+0.002 |
| Female (non-reproductive) | 36 | 0.191+0.003 |
| Female (pregnant) | 20 | 0.189+0.005 |
| Female (lactating) | 62 | 0.185+0.003 |
| Female (pregnant and lactating) | 9 | 0.176+0.005 |
